# Supplementary material
Source: PubMed Central journal article supplement (PMC2667066)
Supplement: 0900743106_0900743106SI.pdf [file 0900743106_0900743106SI.pdf]

# Supporting Information

Li et al. 10.1073/pnas.0900743106

## SI Text

**Neutrophil Lysis Assay.** Human polymorphonuclear leukocytes (or neutrophils) were isolated from heparinized venous blood of healthy individuals with a standard method (1). All work was performed in accordance with a protocol approved by the Institutional Review Board for Human Subjects, National Institute of Allergy and Infectious Diseases. Lysis of neutrophils was determined using a lactate dehydrogenase Cytotoxicity Detection Kit (Roche) according to the manufacturer's protocol and as described previously (2). Culture filtrates were diluted 1:50 for use in the assays.

**PSM Measurement by RP-HPLC/Electrospray Ionization-MS.** Determination of PSM production in *S. aureus* culture filtrates was performed using RP-HPLC/electrospray ionization-MS as described (3). Samples were taken from cultures inoculated from precultures and grown for 8 h (stationary growth phase).

**Protease Assay.** Protease activity was determined by an agar plate diffusion assay. The test agar contained 1.0% skim milk and 1.0% agar. Cultures were grown at 37 °C for 10 h, and 15 mL of culture filtrate was lyophilized. The lyophilisates were dissolved in 3 mL of 20 mmol/L Tris-HCl containing 1 mmol/L CaCl<sub>2</sub> (pH 7.8) and passed through 0.22-mm pore filters. Next, 50 μL was loaded into holes in the plates, which were incubated at 37 °C for 8 h.

**Hemolysis Assay.** *S. aureus* was grown to early stationary growth phase (4 h); equal amounts of cells were spotted on sheep blood agar plates and incubated at 37 °C for 24 h.

**Western Blot Analysis.** Culture filtrates from bacterial cultures grown to late exponential growth phase (4 h) were precipitated using 10% (vol/vol) trichloroacetic acid, separated on a 12% SDS/PAGE gel, blotted on Hybond-C-membranes (Amersham Biosciences), and incubated with α-toxin antibody (1:10,000) for 1 h. Immunoreactive protein was visualized using an ECL detection system (Amersham Biosciences).

**Quantitative RT-PCR.** RNAIII expression was detected by quantitative RT-PCR. For RNA isolation, overnight cultures were diluted 1:100 into 50 mL of tryptic soy broth and incubated at 37 °C with shaking at 180 rpm until grown to early stationary phase (4 h, at maximal expression of *agr*). cDNA was synthesized from total RNA using the SuperScript III first-strand synthesis

system (Invitrogen) according to the manufacturer's instructions. Oligonucleotide primers and probes were designed using Primer Express (Applied Biosystems). The experiments were performed in triplicate, with *gyrB* RNA as a control. The primers and probes used were RNAIII-F 5'-TTCAGTGTGTCGATA-ATCCA-3', RNAIII-R 5'-GGAAGGAGTGATTCAATGG-3', and RNAIII-probe 5'-CAAGATATCATTTCAACAAT-CAGTGACTTAGT-3' and GyrB-F 5'-CAAATGATCACA-GCATTGGTACAG-3', GyrB-R 5'-CGGCATCAGTCATA-ATGACGAT-3', and GyrB-probe 5'-AATCGGTGGC-GACTTTGATCTAGCGAAAG-3', respectively. The resulting cDNA and negative control samples were amplified with Taq-Man Universal PCR Master Mix (Applied Biosystems). Reactions were performed in a MicroAmp Optical 96-well reaction plate using a 7700 Sequence Detector (Applied Biosystems). Standard curves were determined for each gene, using purified chromosomal template DNA at concentrations of 0.005–50 ng/mL. All RT-PCR experiments were performed in triplicate, with *gyrB* RNA used as a control.

**Determination of Minimum Inhibitory Concentrations of Different Antimicrobial Peptides.** *S. aureus* cells were grown to mid-log phase; cultures were harvested, washed twice with 10 mM sodium phosphate buffer (pH 6.5) with 100 mM NaCl, and resuspended in LB to a final concentration of 10<sup>5</sup>/mL in each sample. The bacteria were exposed to a range of AMP concentrations and incubated at 37 °C with shaking at 180 rpm for at least 12 h, after which OD<sub>600</sub> was measured. The minimum inhibitory concentration was defined as the concentration at which the OD<sub>600</sub> was reduced by 50%.

**Peptide Degradation Assay.** *S. aureus* cells were grown to exponential growth phase (OD<sub>600</sub>, 2.5–3.0); cultures were harvested, washed twice with 10 mM sodium phosphate buffer (pH 6.5) with 100 mM NaCl, and resuspended in the same buffer. The bacteria were exposed to 100 μg/mL dermcidin and 50 μg/mL melittin, respectively, and incubated at 37 °C. At different incubation time points, 1 mL of the culture was collected and supernatants were lyophilized. Degradation was analyzed on 15% Tricine SDS/PAGE gels.

**Statistics and DNA Sequence Analysis.** Statistical analysis was performed using GraphPad Prism version 4.0 using one-way ANOVA and Bonferroni posttests, unless noted otherwise. DNA sequences were compared using Clustal W software ([www.ch.embnet.org/software/ClustalW.html](http://www.ch.embnet.org/software/ClustalW.html)).

1. Kobayashi SD, Voyich JM, Buhl CL, Stahl RM, DeLeo FR (2002) Global changes in gene expression by human polymorphonuclear leukocytes during receptor-mediated phagocytosis: Cell fate is regulated at the level of gene expression. *Proc Natl Acad Sci USA* 99:6901–6906.
2. Voyich JM, et al. (2006) Is Pantone-Valentine leukocidin the major virulence determinant in community-associated methicillin-resistant *Staphylococcus aureus* disease? *J Infect Dis* 194:1761–1770.

3. Wang R, et al. (2007) Identification of novel cytolytic peptides as key virulence determinants for community-associated MRSA. *Nat Med* 13:1510–1514.

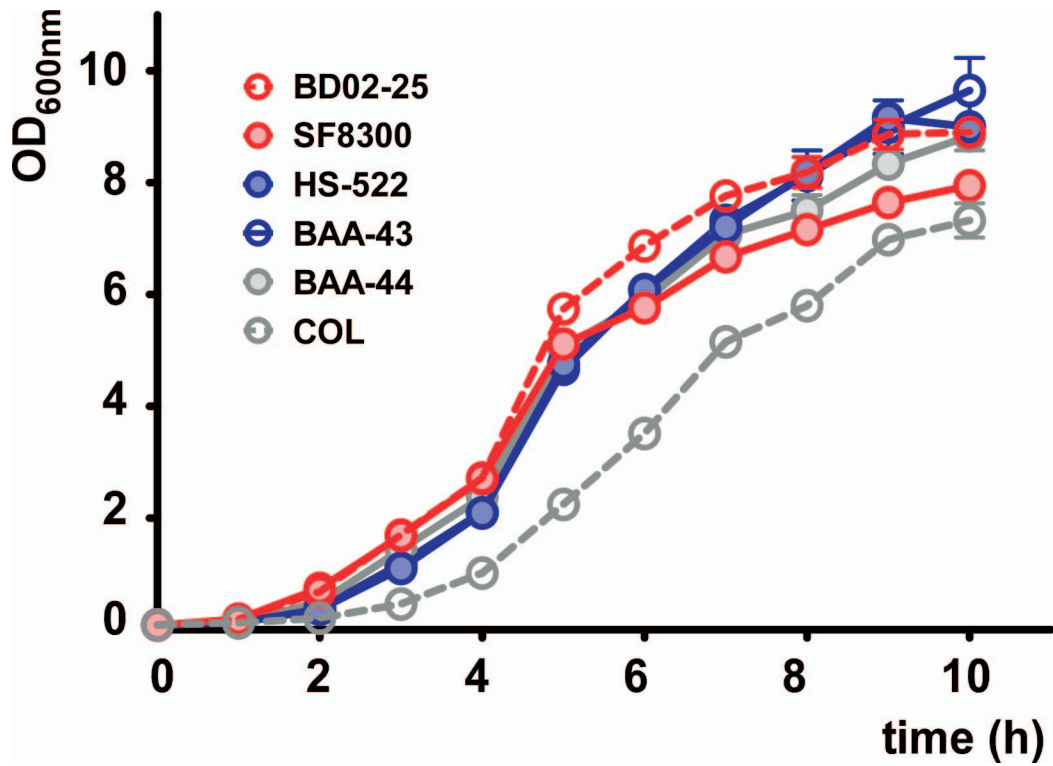

Fig. S1. In vitro growth of CC8 subclones. Strains were inoculated 1:100 from precultures grown overnight and grown with shaking in tryptic soy broth. OD<sub>600</sub> was measured every hour. The analysis was performed in triplicate. Error bars depict SEM.

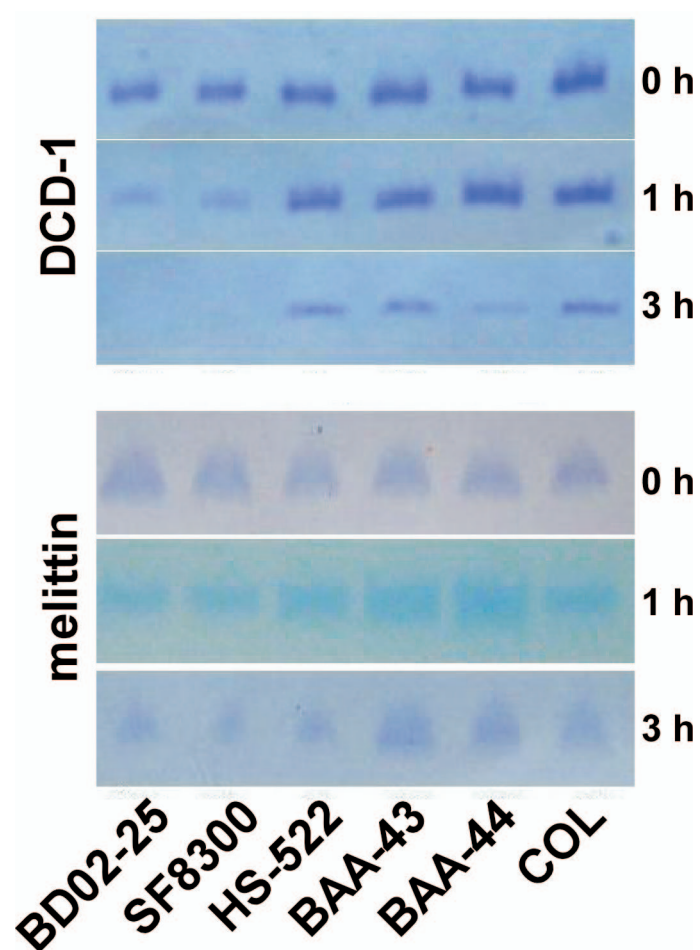

**Fig. S2.** AMP degradation assays. One AMP for which we found differential resistance between USA300, USA500, and the other CC8 strains [dermcidin (DCD-1)] and another for which we did not (melittin) were selected for AMP degradation assays. Equal amounts of peptides (100  $\mu\text{g}/\text{mL}$  DCD-1, 50  $\mu\text{g}/\text{mL}$  melittin) were incubated with culture filtrates of the strains, and aliquots were analyzed after 0, 1, and 3 h of incubation by SDS/PAGE.

**Table S1. Profiles of strains used in this study**

| Strain ID                 | Clonal type | ST  | Multilocus sequence typing |             | SCCmec type | sasA | sasB | sasD | sasE | sasF | sasH | sasI |
|---------------------------|-------------|-----|----------------------------|-------------|-------------|------|------|------|------|------|------|------|
|                           |             |     | allelic profile*           | spa type    |             |      |      |      |      |      |      |      |
| <u>BD02-25</u>            | USA500      | 8   | 3-3-1-1-4-4-3              | YHGFMBQBLO  | IV          | 2    | 2    | 3    | 1    | 7    | 8    | 3    |
| BD02-26                   | USA500      | 8   | 3-3-1-1-4-4-3              | YHGCMBQBLO  | IV          | 2    | 2    | 3    | 1    | 7    | 8    | 3    |
| BD02-27                   | USA500      | 8   | 3-3-1-1-4-4-3              | YHGCMBQBLO  | IV          | 2    | 2    | 3    | 1    | 7    | 8    | 3    |
| FPR3757                   | USA300      | 8   | 3-3-1-1-4-4-3              | YHGFMBQBLO  | IVa         | 2    | New  | 3    | 1    | 7    | 8    | New  |
| LAC                       | USA300      | 8   | 3-3-1-1-4-4-3              | YHGFMBQBLO  | IVa         | 2    | New  | 3    | 1    | 7    | 8    | New  |
| <u>SF8300<sup>†</sup></u> | USA300      | 8   | 3-3-1-1-4-4-3              | YHGFMBQBLO  | IVa         | 2    | New  | 3    | 1    | 7    | 8    | New  |
| <u>COL</u>                | Archaic     | 250 | 3-3-1-1-4-4-16             | YHGFMBQBLO  | I           | 2    | 2    | 3    | 1    | 7    | 8    | 3    |
| BAA-38                    | Archaic     | 247 | 3-3-1-12-4-4-16            | YHFGFMBQBLO | I           | 2    | 2    | 3    | 1    | 7    | 8    | 3    |
| BK1953                    | Iberian     | 247 | 3-3-1-12-4-4-16            | YHFGFMBQBLO | IA          | 2    | 2    | 3    | 1    | 7    | 8    | 3    |
| <u>BAA-44</u>             | Iberian     | 247 | 3-3-1-12-4-4-16            | YHFGFMBQBLO | IA          | 2    | 2    | 3    | 1    | 7    | 8    | 3    |
| BAA-40                    | Portuguese  | 239 | 2-3-1-1-4-4-3              | WGKAOM      | III var     | 5    | 2    | 4    | 1    | 3    | 6    | 3    |
| <u>BAA-43</u>             | Brazilian   | 239 | 2-3-1-1-4-4-3              | WGKAOMQ     | IIIA        | 5    | 2    | 4    | 1    | 3    | 6    | 3    |
| HS-191                    | Chinese     | 239 | 2-3-1-1-4-4-3              | WGKAOMQ     | III.1       | 5    | 2    | 4    | 1    | 3    | 6    | 3    |
| HS-340                    | Chinese     | 239 | 2-3-1-1-4-4-3              | WGKAOMQ     | III.1       | 5    | 2    | 4    | 1    | 3    | 6    | 3    |
| HS-275                    | Chinese     | 239 | 2-3-1-1-4-4-3              | WGKAOMQ     | III.1       | 5    | 2    | 4    | 1    | 3    | 6    | 3    |
| <u>HS-522</u>             | Chinese     | 239 | 2-3-1-1-4-4-3              | WGKAQQ      | III.1       | 5    | 2    | 4    | 1    | 3    | 6    | 3    |
| HS-362                    | Chinese     | 239 | 2-3-1-1-4-4-3              | WGKMQ       | III.1       | 5    | 2    | 4    | 1    | 3    | 6    | 3    |
| HS-227                    | Chinese     | 239 | 2-3-1-1-4-4-3              | WGKAOM      | III.1       | 5    | 2    | 4    | 1    | 3    | 6    | 3    |
| NCTC8325                  | lab strain  | 8   | 3-3-1-1-4-4-3              | YHGGFMBQBLO | —           | 2    | 2    | 3    | 1    | 7    | 8    | 3    |
| MRSA1633                  | USA1100     | 30  | 2-2-2-2-6-3-2              | XKAKAOMQ    | IV          | 5    | 5    | 4    | 25   | 2    | 6    | 8    |
| MRSA1677                  | USA1100     | 30  | 2-2-2-2-6-3-2              | XKAKAOMQ    | IV          | 5    | 5    | 4    | 25   | 2    | 6    | 8    |
| MRSA2865                  | USA1100     | 30  | 2-2-2-2-6-3-2              | XKAKAOMQ    | IV          | 5    | 5    | 4    | 25   | 2    | 6    | 8    |
| MRSA2121                  | USA1100     | 30  | 2-2-2-2-6-3-2              | XKAKAOMQ    | IV          | 5    | 5    | 4    | 25   | 2    | 6    | 8    |
| MRSA1234                  | USA1100     | 30  | 2-2-2-2-6-3-2              | XKAKAOMQ    | IV          | 5    | 5    | 4    | 25   | 2    | 6    | 8    |
| MRSA1200                  | USA1100     | 30  | 2-2-2-2-6-3-2              | XKAKAOMQ    | IV          | 5    | 5    | 4    | 25   | 2    | 6    | 8    |
| MRSA1162                  | USA1100     | 30  | 2-2-2-2-6-3-2              | XKAKAOMQ    | IV          | 5    | 5    | 4    | 25   | 2    | 6    | 8    |
| Mu50                      | NY/Japanese | 5   | 1-4-1-4-12-1-10            | TJMBMDMGMK  | II          | 2    | 3    | 2    | 1    | 6    | 7    | 5    |
| N315                      | NY/Japanese | 5   | 1-4-1-4-12-1-10            | TJMBMDMGMK  | II          | 2    | 3    | 2    | 1    | 6    | 7    | 5    |
| MW2                       | USA400      | 1   | 1-1-1-1-1-1-1              | UJJFKBFE    | IVa         | 11   | 3    | 8    | 1    | 18   | 14   | 17   |

\*Based on 7 housekeeping genes according to Enright et al. (1) (see Table S3).

<sup>†</sup>Strains used for virulence studies are underlined.

Enright MC, Day NP, Davies CE, Peacock SJ, Spratt BG (2000) Multilocus sequence typing for characterization of methicillin-resistant and methicillin-susceptible clones of *Staphylococcus aureus*. *J Clin Microbiol* 38:1008–1015.

**Table S2. Virulence gene presence in CC8 and control strains**

|                               | USA500 | USA300 | Archaic | Iberian | Portuguese-Brazilian | Chinese | ST30 | NCTC 8325 | Mu50 | N315 | MW2 |
|-------------------------------|--------|--------|---------|---------|----------------------|---------|------|-----------|------|------|-----|
| <i>lukS-PV</i> (PVL)          |        | +      |         |         |                      |         | +    |           |      |      | +   |
| <i>arcA</i> (ACME)            |        | +      |         |         |                      |         |      |           |      |      |     |
| <i>icaA</i>                   | +      | +      | +       | +       | +                    | +       | +    | +         | +    | +    | +   |
| <i>psm<math>\alpha</math></i> | +      | +      | +       | +       | +                    | +       | +    | +         | +    | +    | +   |
| <i>clfB</i>                   | +      | +      | +       | +       | +                    | +       | +    | +         | +    | +    | +   |
| <i>clfA</i>                   | +      | +      | +       | +       | +                    | +       | +    | +         | +    | +    | +   |
| <i>fnbA</i>                   | +      | +      | +       | +       | +                    | +       | +    | +         | +    | +    | +   |
| <i>ssp</i>                    | +      | +      | +       | +       | +                    | +       | +    | +         | +    | +    | +   |
| <i>lukE</i>                   | +      | +      | +       | +       | +                    | +       |      | +         | +    | +    | +   |
| <i>lukM</i>                   |        |        |         |         |                      |         |      |           |      |      | +   |
| <i>hla</i>                    | +      | +      | +       | +       | +                    | +       | +    | +         | +    | +    |     |
| <i>hlg</i>                    | +      | +      | +       | +       | +                    | +       | +    | +         | +    | +    | +   |
| <i>hld</i>                    | +      | +      | +       | +       | +                    | +       | +    | +         |      |      | +   |
| <i>hlb</i>                    | +      | +      | +       | +       | +                    | +       |      | +         |      |      | +   |
| <i>sbi</i>                    | +      | +      | +       | +       | +                    | +       |      | +         | +    | +    | +   |
| <i>bsaA</i>                   | +      | +      | +       | +       | +                    | +       |      | +         |      |      |     |
| <i>sdrC</i>                   | +      | +      | +       | +       | +                    | +       | +    | +         |      |      | +   |
| <i>sdrD</i>                   | +      | +      | +       | +       | +                    | +       |      | +         | +    | +    | +   |
| <i>sdrE</i>                   | +      | +      | +       |         | +                    | +       |      |           | +    | +    | +   |
| <i>cap5</i>                   | +      | +      | +       | +       |                      |         |      | +         | +    | +    | +   |
| <i>cap8</i>                   |        |        |         |         | +                    | +       | +    |           |      |      |     |
| <i>can</i>                    |        |        |         |         | +                    | +       | +    |           |      |      | +   |
| <i>tst</i>                    |        |        |         |         |                      |         |      |           | +    | +    |     |
| <i>sea</i>                    |        |        | +       | +       |                      | +       |      |           | +    |      |     |
| <i>seb</i>                    |        |        | +       |         |                      |         |      |           |      |      | +   |
| <i>sec</i>                    |        |        |         |         |                      |         |      |           | +    | +    |     |
| <i>see</i>                    |        |        |         |         |                      |         |      |           |      |      | +   |
| <i>sed</i>                    |        |        |         |         |                      |         |      |           |      |      |     |
| <i>sej</i>                    |        |        |         |         |                      |         |      |           |      |      |     |
| <i>seg</i>                    |        |        |         |         |                      |         | +    |           | +    | +    |     |
| <i>sei</i>                    |        |        |         |         |                      |         | +    |           | +    | +    |     |
| <i>sem</i>                    |        |        |         |         |                      |         | +    |           | +    | +    |     |
| <i>sen</i>                    |        |        |         |         |                      |         | +    |           | +    | +    |     |
| <i>seo</i>                    |        |        |         |         |                      |         | +    |           | +    | +    |     |
| <i>she</i>                    |        |        |         |         |                      |         |      |           |      |      |     |
| <i>sek</i>                    |        | +      | +       |         |                      | +       |      |           |      |      | +   |
| <i>seq</i>                    |        | +      | +       |         |                      | +       |      |           |      |      | +   |
| <i>sel</i>                    |        |        |         |         |                      |         |      |           | +    | +    | +   |
| <i>sep</i>                    |        |        |         |         |                      |         |      |           |      | +    | +   |
| <i>spIB</i>                   | +      | +      | +       | +       | +                    | +       |      | +         | +    | +    |     |
| <i>bbp</i>                    |        |        |         |         |                      |         | +    |           |      |      | +   |
| <i>EDIN</i>                   |        |        |         |         |                      |         |      |           |      |      |     |
| <i>ebpS</i>                   |        |        |         |         |                      |         | +    |           | +    | +    |     |
| <i>efb</i>                    | +      | +      | +       | +       | +                    | +       |      | +         | +    | +    | +   |

\*Present in some analyzed strains.

**Table S3. Oligonucleotides used in this study**

| Gene product (gene locus)                                         | Forward primer (5'-3')         | Reverse primer (5'-3')         | PCR product length (bp) | Genome location  | Reference |
|-------------------------------------------------------------------|--------------------------------|--------------------------------|-------------------------|------------------|-----------|
| <b>MLST housekeeping genes</b>                                    |                                |                                |                         |                  |           |
| Carbamate kinase ( <i>arcC</i> )                                  | TTGATTCACCAGCGGTATTGTC         | AGGTATCTGCTTCAATCAGCG          | 570                     | 348.2            | (1)       |
| Shikimate dehydrogenase ( <i>aroE</i> )                           | ATCGGAAATCCTATTACCATTC         | GGTGTGTATTAAATACGATATC         | 536                     | 213.6            | (1)       |
| Glycerol kinase ( <i>glpF</i> )                                   | CTAGGAATGCAATCTTAATCC          | TGGTAAATCGCATGTCCAATTC         | 576                     | 164.5            | (2)       |
| Guanylate kinase ( <i>gmK</i> )                                   | ATCGTTTTATCGGGACCATC           | TCATTAACACAAAGTAACTCGTA        | 487                     | 153.0            | (1)       |
| Phosphate acetyltransferase ( <i>pta</i> )                        | GTTAAAATCGTATTACCTGAAGG        | GACCCTTTTGTGAAAAGCTTAA         | 575                     | 80.7             | (1)       |
| Triosephosphate isomerase ( <i>tpi</i> )                          | TCGTTCAATCTGAACGCTGTGAA        | TTTGACCTTCTAACAAATGTAC         | 475                     | 106.0            | (2)       |
| Acetyl coenzyme A acetyltransferase ( <i>yqi</i> )                | CAGCATACAGGACACCTATTGGC        | CGTTGAGGAATCGATCTGGAAC         | 598                     | 50.9             | (3)       |
| <b>Surface protein genes</b>                                      |                                |                                |                         |                  |           |
| <i>Staphylococcus aureus</i> surface protein SasA ( <i>sasA</i> ) | TCAACATCCTCAAAGAATACTACA       | ATGCGTTACTTAAGCCCAACTAC        | 571                     | 353.0            | (1)       |
| <i>Staphylococcus aureus</i> surface protein SasB ( <i>sasB</i> ) | GTTGCAGCGCTTGTGACT             | ATTTTTGAGATTTCTCGTTTTTA        | 578                     | 286.3            | (1)       |
| <i>Staphylococcus aureus</i> surface protein SasD ( <i>sasD</i> ) | GGCGGAGTAGTACCACAAGGAA         | AATGCTAAGAATAACCCAGATACT       | 554                     | 19.5             | (1)       |
| <i>Staphylococcus aureus</i> surface protein SasE ( <i>sasE</i> ) | TTACAATGCAAAACAATAAAGA         | GTTTAGGCGTTTGTATGTTTT          | 563                     | 140.9            | (1)       |
| <i>Staphylococcus aureus</i> surface protein SasF ( <i>sasF</i> ) | GGATAGCAAAGACAATAAAAGTTC       | TGATATGTGTAATGTTGCGTTGAG       | 522                     | 350.8            | (1)       |
| <i>Staphylococcus aureus</i> surface protein SasH ( <i>sasH</i> ) | CGCACCAACTAACAAACCACTAC        | TAGCCCAATAATCCATAACGA          | 562                     | 4.0              | (1)       |
| <i>Staphylococcus aureus</i> surface protein SasI ( <i>sasI</i> ) | ATACTATCACTTTTTCAGCATCAA       | TCATTCGTTTTATCGTTAGTATTA       | 565                     | 231.3            | (4)       |
| <b>Virulence genes</b>                                            |                                |                                |                         |                  |           |
| PVL S chain ( <i>lukS-PV</i> )                                    | ATCATTAGTAAAATGTCTGGACATGATCCA | GCATCAACTGTATTGGATAGCAAAAAGC   | 433                     | 193.9            | (5)       |
| ACME ( <i>arcA</i> )                                              | GAGCCGAAGTACGGGAG              | CACGTAACCTGTAGAACGAG           | 723                     | 9.2              | (1)       |
| Polysaccharide intercellular adhesin protein A ( <i>icaA</i> )    | GATTATGTAATGTGCTTGG            | ACTACTGCTGGTTAATAAT            | 770                     | 354.3            | (6)       |
| PSM $\alpha$ ( <i>psmA</i> )                                      | ATGGGTATCATCGCTGGCATCTAAAGTTA  | TTTTGCGAAAATGTCGATAAATGCTTTGAT | 406                     | 59.7             | (6)       |
| Fibrinogen-binding protein ( <i>clfB</i> )                        | TGCAAGATCAAAGTCTTCT            | TCGGTCTGAAAATAAAGGTA           | 596                     | 347.9            | (6)       |
| Fibrinogen-binding protein ( <i>clfA</i> )                        | GTAGGTACGTTAATCGGTT            | CTCATCAGGTTGTTCCAGG            | 1584                    | 107.9            | (6)       |
| Fibrinogen-binding protein ( <i>fnbA</i> )                        | CACAAAATCGCAACCAAGC            | GGATTTGATTCCTCAGAGGAC          | 1522                    | 330.1            | (6)       |
| Serine protease ( <i>ssp</i> )                                    | GGAGGTTTTAGATGAAAGG            | CGCCATTGCTCGGATTATCAGG         | 988                     | 130.3            | (1)       |
| Leukocidin E ( <i>lukE</i> )                                      | GCAACTTTGTCAGTAGGACTG          | GTCTACTCACTGACATAACTC          | 507                     | 245.2            | (7)       |
| Leukocidin M ( <i>lukM</i> )                                      | TGGATGTTACTATGCAACCTAC         | GTCGTTTCCATATAATGAATCACTAC     | 795                     | Prophage phiPV83 | (8)       |
| $\alpha$ -Hemolysin ( <i>hla</i> )                                | CCAAGAATCTCATATATGTTGTC        | GAAAGGTACCATTGCTGGTC           | 391                     | 144.9            | (8)       |
| $\gamma$ -Hemolysin ( <i>hlg</i> )                                | ATGGATGTCACATGTC               | GTATTTCCATTAAGTCCACCAAG        | 642                     | 318.9            | (8)       |
| $\delta$ -Hemolysin ( <i>hld</i> )                                | TGTTCACTGTGTCGATAATCC          | CTCTCCTYACTGYATTATACG          | 342                     | 269.0            | (8)       |
| $\beta$ -Hemolysin ( <i>hlyB</i> )                                | AGTTGCAACACTTGCAATAGC          | CTTCAGATTGTATGTGTACC           | 202                     | 266.7            | (8)       |
| Immunoglobulin G-binding protein ( <i>sbI</i> )                   | CACAGAGGAACAACGTAACC           | GATTTAGCTAAGTAGCCG             | 957                     | 318.4            | (1)       |
| Bacteriocin ( <i>bsaA</i> )                                       | CACAGAACTGTTAAAATACCC          | GATTAATATGACAAATGAAGTGGGTC     | 197                     | 245.0            | (7)       |
| Ser-Asp rich fibrinogen-binding protein ( <i>sdrC</i> )           | ACGACTATTAACCAAGAAGC           | GTACTGAAATAAGCGGGTTG           | 560                     | 76.6             | (1)       |
| Ser-Asp rich fibrinogen-binding protein ( <i>sdrD</i> )           | GGAAATAAAGTTGAAGTTTC           | ACTTTGTCATCAACTGTAAT           | 500                     | 77.0             | (1)       |
| Ser-Asp rich fibrinogen-binding protein ( <i>sdrE</i> )           | CAGTAAATGTGCAAAAAGA            | TTGACTACCAGCTATATC             | 767                     | 77.6             | (1)       |
| Capsular polysaccharide type 5 ( <i>cap5</i> )                    | ATGACGATGAGGATAGCG             | CTCGGATAACACCTGTTGC            | 881                     | 22.7             | (9)       |
| Capsular polysaccharide type 8 ( <i>cap8</i> )                    | ATGACGATGAGGATAGCG             | CACCTAACATAAGGCAAG             | 1148                    | 19.4             | (9)       |
| Collagen-binding protein ( <i>cna</i> )                           | AAGCATTTGCAGCAGGAG             | ATATGACCCATAGCCTGTGG           | 740                     | 357.1            | (6)       |
| Toxic shock syndrome toxin 1 ( <i>tst</i> )                       | ATCGTAAGCCCTTTGTTG             | GTGGATCCGTCATTCATTG            | 578                     | 263.6            | (8)       |
| Staphylococcal enterotoxin A ( <i>sea</i> )                       | CATTGCCCTAAGCTTGAC             | CGAAGTTCTGTAGAAGTATGG          | 619                     | 216.9            | (8)       |
| Staphylococcal enterotoxin B ( <i>seb</i> )                       | CTAAACCGATGGTTGGAC             | CCAAAATAGTGACGAGTTAGG          | 489                     | 117.5            | (8)       |
| Staphylococcal enterotoxin C ( <i>sec</i> )                       | GTAAGTTACAGGTGGCAAAACTTG       | CATATCATACAAAAGTATTGCCGT       | 296                     | 108.8            | (8)       |
| Staphylococcal enterotoxin E ( <i>see</i> )                       | GCTTTAAGCAATCTTAGGC            | CTATCCACAAGTTAATGGTAC          | 330                     | Unknown          | (8)       |
| Staphylococcal enterotoxin D ( <i>sed</i> )                       | GAATTAAGTAGTACCGCGCTAAATAATA   | CGTGATTTTTCTCCGAGAGT           | 491                     | pIB485 plasmid   | (8)       |
| Staphylococcal enterotoxin J ( <i>sej</i> )                       | TAACCTCAGACATATACTCTTTAAC      | AGTATCATAAAGTGTATTTTCATGC      | 294                     | pIB485 plasmid   | (8)       |
| Staphylococcal enterotoxin G ( <i>seg</i> )                       | TCITTTACGCTCCACC               | GTCTATTGTCGATGTTACC            | 326                     | 240.0            | (4)       |
| Staphylococcal enterotoxin I ( <i>sei</i> )                       | CAACTCGAATTTTCAACAGGTAC        | CAGGCGATCCATCTCTG              | 466                     | 240.3            | (8)       |
| Staphylococcal enterotoxin M ( <i>sem</i> )                       | CTATTAATCTTTGGTTAATGGAGAAC     | TTCAGTTTCGACAGTTTTGTTGTCAT     | 326                     | 240.4            | (8)       |
| Staphylococcal enterotoxin N ( <i>sen</i> )                       | ATGAGATTGTTTACATAGCTGCAAT      | AACTCTGCTCCCCTGAAC             | 680                     | 240.1            | (8)       |
| Staphylococcal enterotoxin O ( <i>seo</i> )                       | AGTTTGTGAAGAAGTCAAGTGTAGA      | ATCTTTAAATTCAGCAGATATCCATCT    | 180                     | 240.6            | (8)       |
| Staphylococcal enterotoxin H ( <i>seh</i> )                       | CGAAAGCAGAAGATTTACAGC          | ACCAATCACCCCTTCTGTG            | 341                     | 7.9              | (8)       |
| Staphylococcal enterotoxin K ( <i>sek</i> )                       | GGTGTCTTAATAGTGCCAG            | TCGTTAGTGTGACTGCTCC            | 284                     | 110.7            | (7)       |
| Staphylococcal enterotoxin Q ( <i>seq</i> )                       | TCTAGCATATGCTGATGAGG           | CAATCTCTGAGCAGTTACYTC          | 383                     | 110.8            | (7)       |
| Staphylococcal enterotoxin L ( <i>sel</i> )                       | ATCAATGGCAAGCATCAACAG          | TGGAAGACCGTATCTCTGTG           | 264                     | 108.9            | (7)       |
| Staphylococcal enterotoxin P ( <i>sep</i> )                       | GACCTTGGTTCAAAAGACACC          | TGCTTGACTGAAGGTCTAGC           | 275                     | 257.3            | (7)       |
| Serine protease-like B ( <i>spB</i> )                             | CCATATACTGGTGTAGTTG            | GGGTGTGGATAACCAATC             | 332                     | 243.4            | (1)       |
| Bone sialoprotein-binding protein ( <i>bbp</i> )                  | CAGTAAATGTGCAAAAAGA            | TACACCCCTGTTGAACTG             | 1055                    | 76.9             | (1)       |
| Epidermal cell differentiation inhibitor ( <i>edin</i> )          | GAAGTATCTAATCTCTTAGCAGC        | TCATTTGACAATTCTACACTTCCAAC     | 619                     | EDINA plasmid    | (2)       |
| Elastin-binding protein ( <i>ebpS</i> )                           | CAATCGATAGACAAAATTC            | CAGTTACATCATGTTTA              | 526                     | 194.2            | (2)       |
| Fibrinogen-binding protein ( <i>efb</i> )                         | AACATTAGCGCAATAGG              | ATTCGCTCTGTAAGACC              | 432                     | 144.5            | (1)       |
| Immunoglobulin G-binding protein A ( <i>spa</i> )                 | GACGATCCTCGGTGAGC              | CAGCAGTAGTCCGCTTTGC            | 342                     | 16.1             | (2)       |

- Diep BA, et al. (2006) Complete genome sequence of USA300, an epidemic clone of community-acquired methicillin-resistant *Staphylococcus aureus*. *Lancet* 367:731-739.
- Baba T, et al. (2002) Genome and virulence determinants of high virulence community-acquired MRSA. *Lancet* 359:1819-1827.
- Holden MT, et al. (2004) Complete genomes of two clinical *Staphylococcus aureus* strains: Evidence for the rapid evolution of virulence and drug resistance. *Proc Natl Acad Sci USA* 101:9786-9791.
- Kuroda M, et al. (2001) Whole genome sequencing of methicillin-resistant *Staphylococcus aureus*. *Lancet* 357:1225-1240.
- Lina G, et al. (1999) Involvement of Panton-Valentine leukocidin-producing *Staphylococcus aureus* in primary skin infections and pneumonia. *Clin Infect Dis* 29:1128-1132.
- Peacock SJ, et al. (2002) Virulent combinations of adhesin and toxin genes in natural populations of *Staphylococcus aureus*. *Infect Immun* 70:4987-4996.
- Diep BA, Carleton HA, Chang RF, Sensabaugh GF, Perdreau-Remington F (2006) Roles of 34 virulence genes in the evolution of hospital- and community-associated strains of methicillin-resistant *Staphylococcus aureus*. *J Infect Dis* 193:1495-1503.
- Jarraud S, et al. (2002) Relationships between *Staphylococcus aureus* genetic background, virulence factors, *agr* groups (alleles), and human disease. *Infect Immun* 70:631-641.
- Moore PC, Lindsay JA (2001) Genetic variation among hospital isolates of methicillin-sensitive *Staphylococcus aureus*: Evidence for horizontal transfer of virulence genes. *J Clin Microbiol* 39:2760-2767.
